# Supplementary material for: Enhanced visible light photocatalytic degradation of dyes in aqueous solution activated by HKUST-1: performance and mechanism
Source: Royal Society of Chemistry journal article supplement (doi:10.1039/d0ra05275b), 2020-01-01
Supplement: d0ra05275b1.pdf [file d0ra05275b1.pdf]

## Electronic Supplementary Information

### Enhanced visible light photocatalytic degradation of dyes in aqueous activated by HKUST-1: performance and mechanism

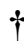

Jianguo Zhang<sup>a</sup>, Chunli Su<sup>\*a</sup>, Xianjun Xie<sup>a</sup>, Peng Liu<sup>a</sup>, Md. Enamul Huq<sup>b</sup>

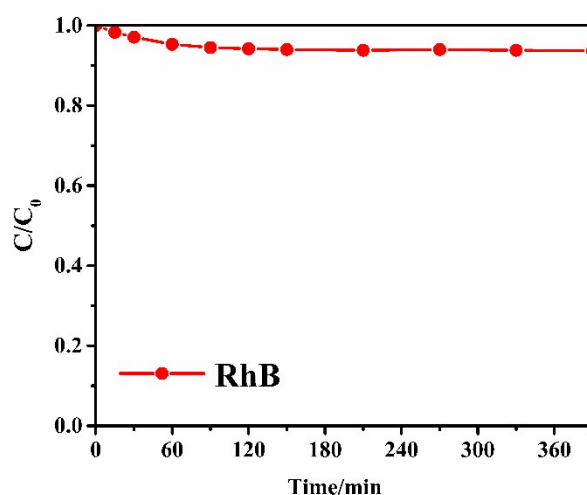

Fig. S1: Adsorption equilibrium curve of HKUST-1 to RhB

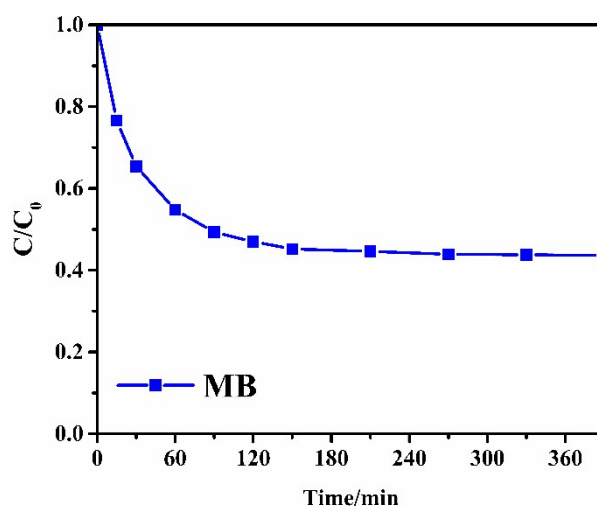

Fig. S2: Adsorption equilibrium curve of HKUST-1 to RhB

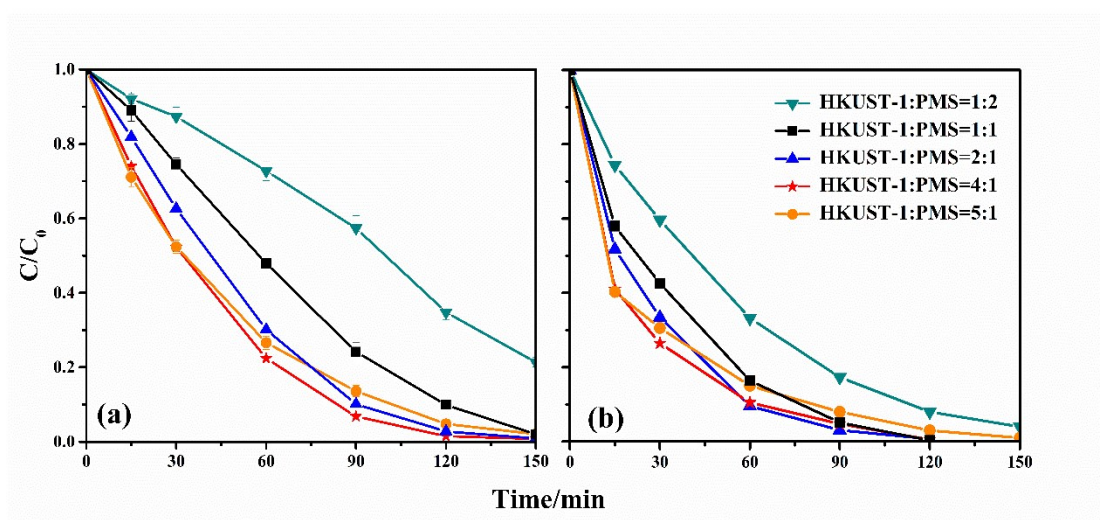

Fig. S3: Effect of dosage of medicament on degradation of RhB. (PMS:0.2 g L<sup>-1</sup>(a), PMS:0.6g L<sup>-1</sup>)

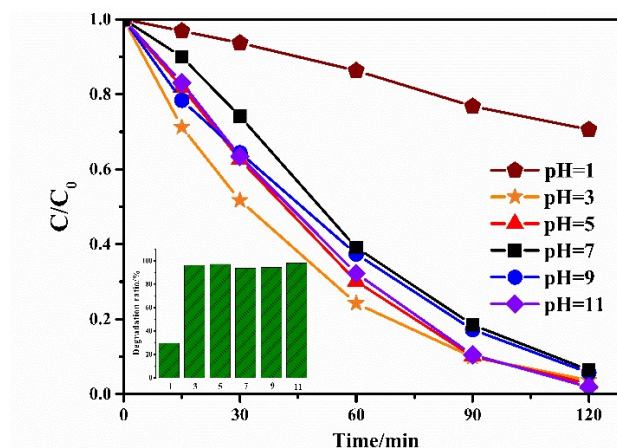

Fig. S4: initial pH (d) on the degradation of RhB.
